# Supplementary material for: The Protein Kinase Inhibitor Midostaurin Improves Functional Neurological Recovery and Attenuates Inflammatory Changes Following Traumatic Cervical Spinal Cord Injury
Source: Biomolecules. 2021 Jul 1;11(7):972. doi: 10.3390/biom11070972 (PMC8301989; doi:10.3390/biom11070972)
Supplement: Supplementary file 1 [file biomolecules-11-00972-s001.zip › Supplementary material (2).pdf]

# Supplementary File

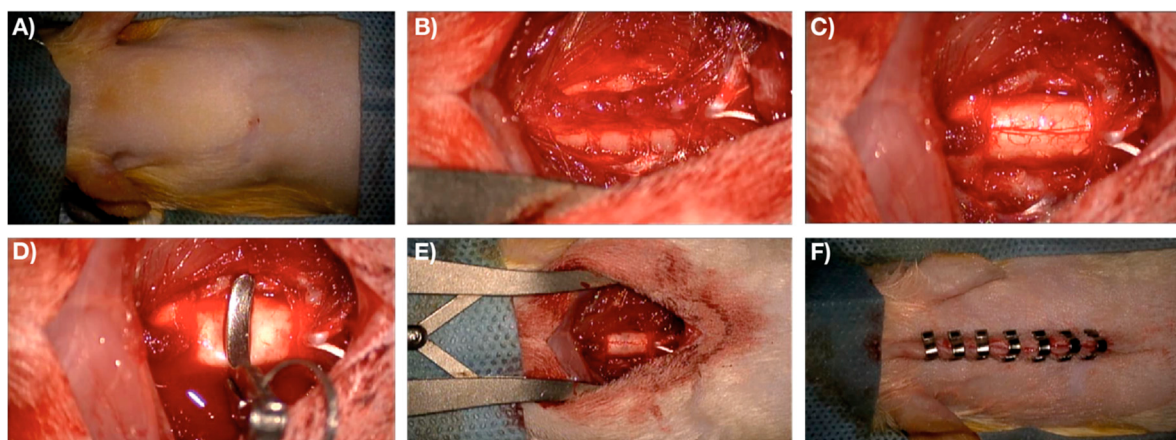

**Supplementary Figure S1:** Representative images of the surgical procedure to induce C6/7 laminectomy and C6/7 clip-compression injury. A) The wound area was disinfected with Povidone-iodine and ethanol. B) The muscles were incised exposing the laminae. C) The C6/7 laminae was removed using a bone cutter without touching the spinal cord. D) The clip was passed under the spinal cord and released to induce compression-contusion injury. E) The clip was removed, and the local blood was cleared. F) The muscles were sutured and the skin was closed using staples.

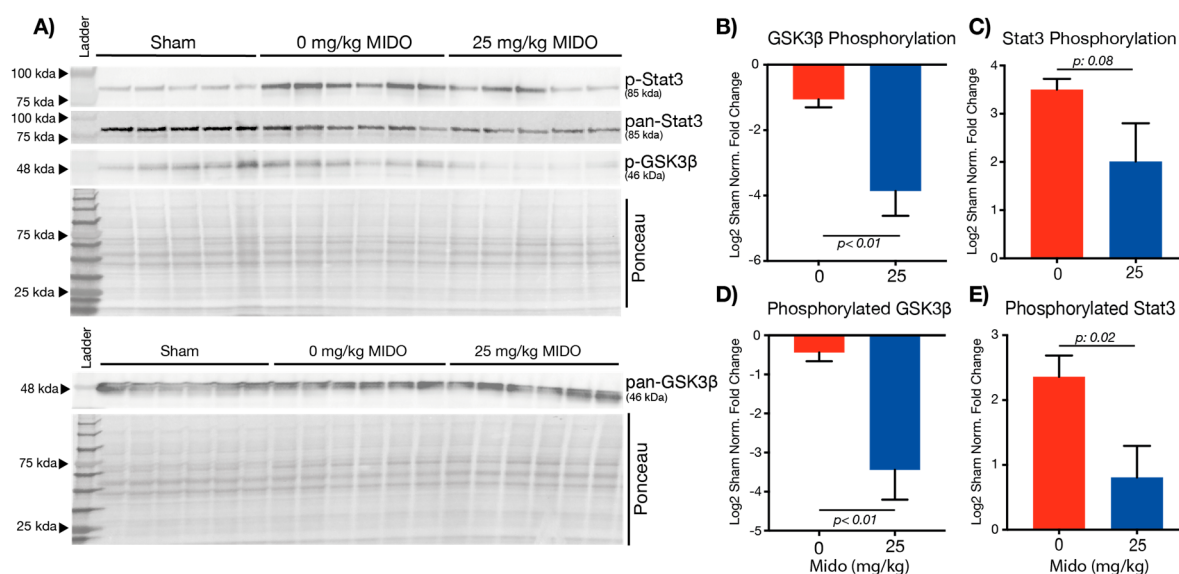

**Supplementary Figure S2:** Western blot membranes demonstrating reduced phosphorylation of Signal Transducer and Activator of Transcription 3 (STAT3) and Glycogen Synthase Kinase 3 (GSK3β). A) Total protein was visualized via Ponceau S staining. The molecular weights were determined using the Sigma-Aldric BLUEye Prestained Protein Ladder. The membranes were imaged using BioRad Chemidoc™ and analyzed using Bio-Rad Image Lab™ software. The bar graphs illustrate log2 fold change (compared to uninjured shams) band volume. B-C) The two graphs represent the p-GSK3β and p-STAT3 band volumes respectively normalized to Ponceau S total protein staining. D-E) The phosphorylation graphs illustrate the levels of phosphorylated GSK3β and STAT3 normalized to pan-GSK3β and pan-STAT3 levels, respectively.

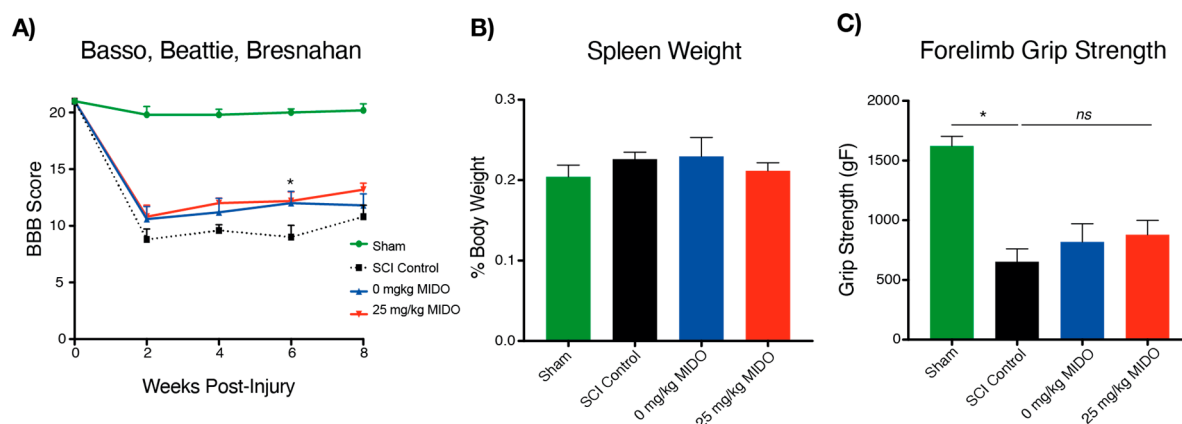

**Supplementary Figure S3:** Ancillary measurements at 8 weeks post-injury (n=5 per cohort). A-B) Forelimb grip strength and BBB score are significantly reduced after cervical SCI. B) The BBB score is significantly increased in 25mg/kg midostaurin compared to the SCI control. C) Spleen weight was normalized to the time-matched total body weight. No significant change in spleen weight at 8 weeks post-injury.

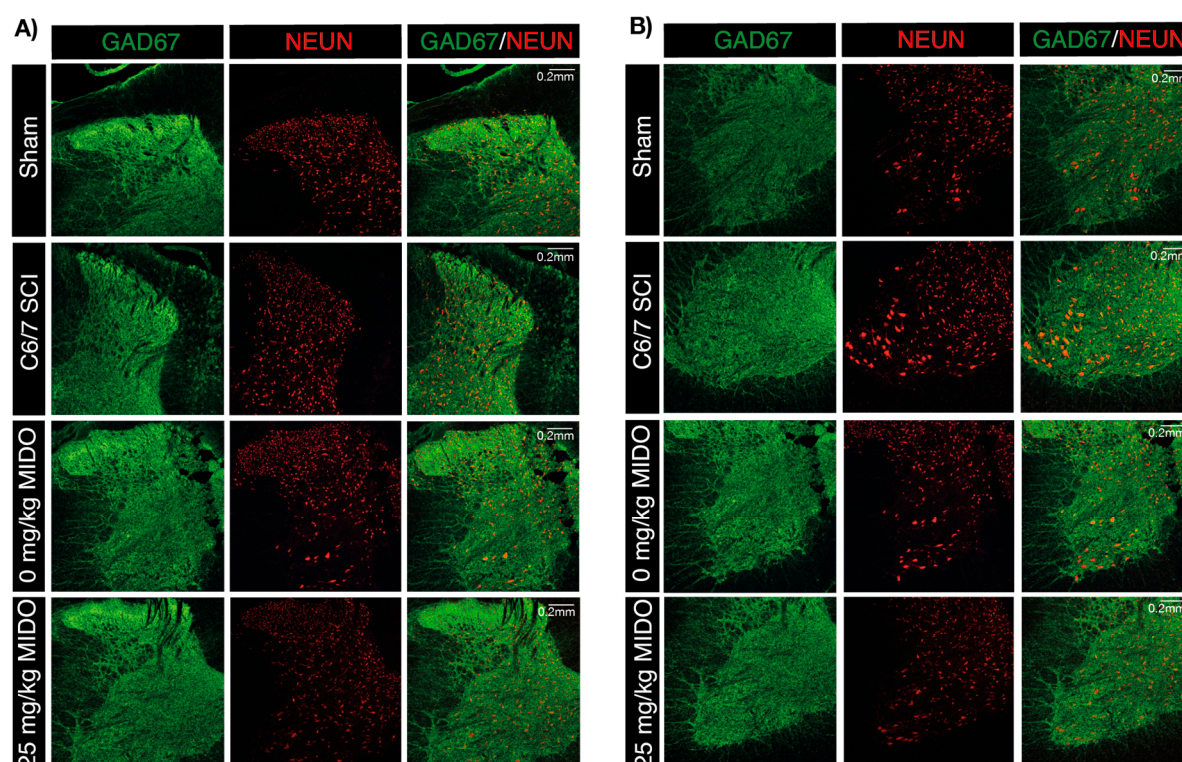

**Supplementary Figure S4:** Representative images of GAD67 and NEUN staining at the dorsal and ventral horns. A) GAD67 staining (green) and NEUN staining (red) at the dorsal horn. B) GAD67 staining (green) and NEUN staining (red) at the ventral horn.

**Supplementary Table S1:** List of antibodies used for western blot and immunohistochemistry.

| Application          | Primary Antibody                                                                                                                               | Secondary Antibody                                                                                            |
|----------------------|------------------------------------------------------------------------------------------------------------------------------------------------|---------------------------------------------------------------------------------------------------------------|
| Western blot         | <b>Anti-Phospho-GSK-3<math>\beta</math> (Ser9)</b><br>Cell Signaling Technology<br>Cat#: 9336S<br>Host species: Rabbit<br>Concentration: 1:250 | <b>Anti-rabbit HRP</b><br>Sigma Aldrich<br>Cat#: A0545<br>Host species: Goat<br>Concentration: 1:250          |
|                      | <b>Anti-GSK-3<math>\beta</math></b><br>Cell Signaling Technology<br>Cat#: 9336S<br>Host Species: Rabbit<br>Concentration: 1:250                | <b>Anti-rabbit HRP</b><br>Sigma Aldrich<br>Cat#: A0545<br>Host species: Goat<br>Concentration: 1:250          |
|                      | <b>Anti-Phospho-Stat3 (Tyr705)</b><br>Cell Signaling Technology<br>Cat#: 9131<br>Host species: Rabbit<br>Concentration: 1:250                  | <b>Anti-rabbit HRP</b><br>Sigma Aldrich<br>Cat#: A0545<br>Host species: Goat<br>Concentration: 1:250          |
|                      | <b>Anti-Stat3</b><br>Cell Signaling Technology<br>Cat#: 9139S<br>Host species: mouse<br>Concentration: 1:250                                   | <b>Anti-mouse HRP</b><br>Sigma Aldrich<br>Cat#: A3682<br>Host species: Goat<br>Concentration: 1:250           |
| Immunohistochemistry | <b>Anti-GAD67</b><br>Millipore Sigma<br>Cat#: MAB5406<br>Host: Mouse<br>Concentration: 1:500                                                   | <b>Anti-Mouse IgG Alexa Fluor 647</b><br>ThermoFisher<br>Cat#: A-21235<br>Host: Goat<br>Concentration: 1:500  |
|                      | <b>Anti-NeuN</b><br>Millipore Sigma<br>Cat#: ABN78<br>Host: Rabbit<br>Concentration: 1:500                                                     | <b>Anti-Rabbit IgG Alexa Fluor 488</b><br>ThermoFisher<br>Cat#: A-11034<br>Host: Goat<br>Concentration: 1:500 |

**Supplementary Table S2:** Functional classification of inflammatory markers following SCI [47].

|                     | Pro-inflammatory | Anti-inflammatory |
|---------------------|------------------|-------------------|
| Cytokine/Chemokines | GM-CSF           | G-CSF             |
|                     | IL-1 $\alpha$    | Leptin            |
|                     | IL-1 $\beta$     | IL-4              |
|                     | IL-2             | IL-10             |
|                     | IL-17A           | IL-12             |
|                     | IL-18            | Eotaxin           |
|                     | MCP1             |                   |
|                     | IP10             |                   |
|                     | Fractalkine      |                   |
|                     | LIX              |                   |
|                     | MIP2             |                   |
|                     | RANTES           |                   |
|                     | TNF- $\alpha$    |                   |
|                     | IL-5             |                   |
| <b>Total counts</b> | <b>14</b>        | <b>6</b>          |

**Supplementary Table S3:** List of TaqMan primers used for RT-qPCR.

|                           | Gene name      | Assay ID      |
|---------------------------|----------------|---------------|
| <b>Endogenous control</b> | <i>Ppia</i>    | Rn00690933_m1 |
| <b>Target probes</b>      | <i>Cxcl12</i>  | Rn00573260_m1 |
|                           | <i>F11r</i>    | Rn00587389_m1 |
|                           | <i>Itga1</i>   | Rn01754645_m1 |
|                           | <i>Cd99</i>    | Rn01441198_m1 |
|                           | <i>Thy1</i>    | Rn00562048_m1 |
|                           | <i>Cldn3</i>   | Rn00581751_s1 |
|                           | <i>Cdh5</i>    | Rn01536708_m1 |
|                           | <i>Pecam1</i>  | Rn01467262_m1 |
|                           | <i>Itga4</i>   | Rn01512798_m1 |
|                           | <i>Itgb2</i>   | Rn01427948_m1 |
|                           | <i>Itgam</i>   | Rn00709342_m1 |
|                           | <i>Ctnnd1</i>  | Rn01486371_m1 |
|                           | <i>Ctnna2</i>  | Rn01421320_m1 |
|                           | <i>Arhgap5</i> | Rn03036858_s1 |
|                           | <i>Rhoa</i>    | Rn00589172_m1 |
|                           | <i>Ptk2</i>    | Rn00433209_m1 |
|                           | <i>Pxn</i>     | Rn01499294_m1 |
|                           | <i>Jam2</i>    | Rn01498607_m1 |
|                           | <i>Jam3</i>    | Rn01524967_m1 |
|                           | <i>TJP1</i>    | Rn02116071_s1 |
|                           | <i>Cldn5</i>   | Rn01753146_s1 |
|                           | <i>Ocln</i>    | Rn00580064_m1 |
|                           | <i>Mmp9</i>    | Rn00579162_m1 |
|                           | <i>Lcn2</i>    | Rn00590612_m1 |
|                           | <i>Itgb1</i>   | Rn00566727_m1 |
|                           | <i>Ctnnb1</i>  | Rn00584431_g1 |
| <b>Total Counts</b>       | <b>27</b>      | <b>27</b>     |
